# Supplementary material for: Orthogonal control of gene expression in plants using synthetic promoters and CRISPR-based transcription factors
Source: bioRxiv or medRxiv preprint supplement (doi:10.1101/2021.11.16.468903), 2021-11-17
Supplement: Supplementary file [file media-1.pdf]

1  
2  
3  
4  
5 **Supplementary information for**

6 **Orthogonal control of gene expression using synthetic promoters and**  
7 **CRISPR-based transcription factors**

8 Shaunak Kar<sup>1,2,#</sup>, Yogendra Bordiya<sup>1,4,#</sup>, Nestor Rodriguez<sup>1</sup>, Junghyun Kim<sup>1</sup>, Elizabeth  
9 C. Gardner<sup>1,2</sup>, Jimmy Gollihar<sup>2</sup>, Sibum Sung<sup>1,\*</sup> and Andrew D. Ellington<sup>1,2,\*</sup>

10  
11  
12 <sup>1</sup> Department of Molecular Biosciences, University of Texas at Austin, Austin TX, USA

13 <sup>2</sup> Center for Systems and Synthetic Biology, University of Texas at Austin, Austin, TX,  
14 USA

15 <sup>3</sup>US Army Research Laboratories–South, Austin, Texas, USA

16 <sup>4</sup> Present address: Life Sciences Solutions group, Thermo Fisher Scientific, Austin, TX,  
17 USA

18  
19 # Authors contributed equally

20 \* Corresponding authors

21  
22 Sibum Sung: sbsung@austin.utexas.edu, Andrew D. Ellington: ellingtonlab@gmail.com  
23  
24  
25  
26  
27  
28  
29  
30  
31  
32  
33  
34  
35  
36  
37  
38  
39  
40  
41  
42  
43  
44  
45

46 **Figure S1:** Workflow describing the assembly of single and multiple transcriptional units  
47 (TUs) in a plant expression vector

48

49

50 **Figure S2:** Western blot to analyze the expression of dCas9:VP64 in OCS constructs –  
51 OCS1-1 and OCS 1-5

52

53 **Table S1:** List of all genetic parts used for the construction of OCS constructs

54

55 **Table S2:** List of all OCS constructs

56

57 **Table S3:** List of all Addgene plasmids used in this work

58

59

60

61

62

63

64

65

66

67

68

69

70

71

72

73

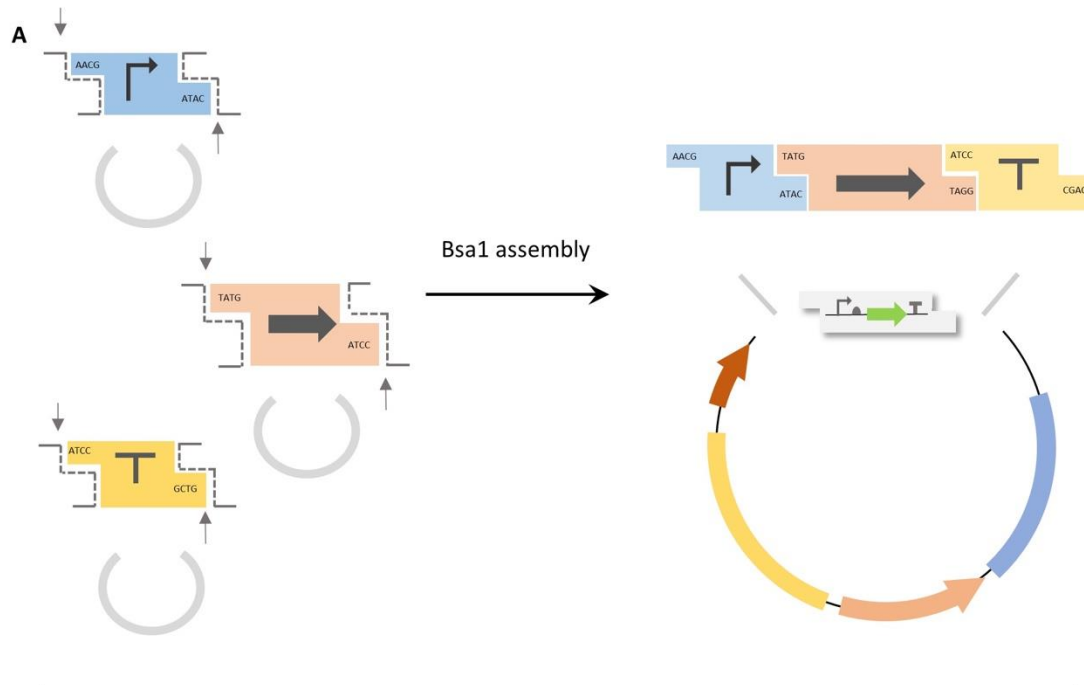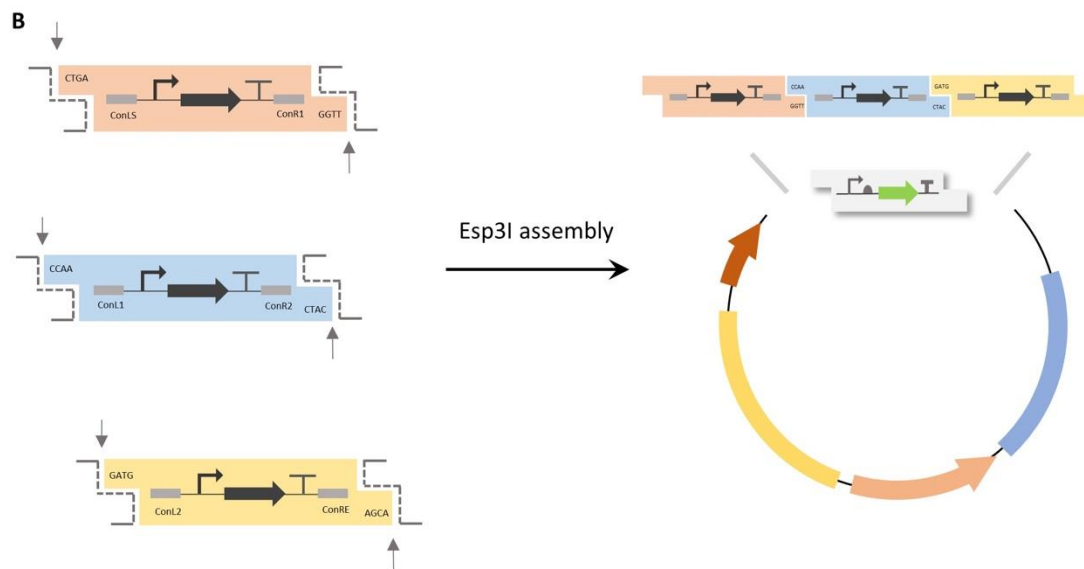

74  
75  
76  
77  
78  
79  
80  
81  
82

**Supplementary figure 1:** Schematic demonstrating the assembly of single (A) or multiple (B) transcriptional units into a plant expression vector. A single transcriptional unit consists of a promoter, gene and a terminator parts while for multiple transcriptional units, each TU is flanked by appropriate connector sequences. The arrows depict the restriction sites for Bsa1 (A) and Esp3I (B). B) Schematic showing the assembly of multiple TUs into plant expression vector where each TU is encoded in separate plasmids flanked by appropriate connector sequences.

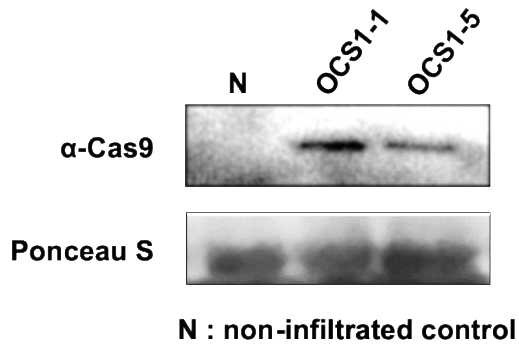

83  
84  
85  
86  
87  
88  
89  
90  
91  
92  
93  
94  
95  
96  
97  
98  
99  
100  
101  
102  
103  
104  
105  
106  
107  
108  
109  
110  
111  
112  
113  
114  
115  
116  
117  
118

**Supplementary figure 2:** The expression of hdCas9 for both OCS 1-1 and OCS 1-5 was confirmed via Western blot analysis (see Methods).

119 **Table S1: List of genetic elements used.**

120

121 Highlighted regions in red indicate Bsal recognition sites and the corresponding  
 122 overhangs are highlighted in blue.

123

124 **S1.1 Promoters**

125

| Name | Description  | Sequence                                                                                                                                                                                                                                                                                                                                                                                                                                                                                                                                                                                                                           |
|------|--------------|------------------------------------------------------------------------------------------------------------------------------------------------------------------------------------------------------------------------------------------------------------------------------------------------------------------------------------------------------------------------------------------------------------------------------------------------------------------------------------------------------------------------------------------------------------------------------------------------------------------------------------|
| P1   | 35S promoter | GGTCTCAAACGCGTCAACATGGTGGAGCACGACAC<br>TCTGGTCTACTCCAAAAATGTCAAAGATACAGTCTCA<br>GAAGATCAAAGGGCTATTGAGACTTTTCAACAAAGG<br>ATAATTTTCGGGAAACCTCCTCGGATTCCATTGCCCA<br>GCTATCTGTCACTTCATCGAAAGGACAGTAGAAAAG<br>GAAGGTGGCTCCTACAAATGCCATCATTGCGATAAA<br>GGAAAGGCTATCATTCAAGATCTCTCTGCCGACAGT<br>GGTCCCAAAGATGGACCCCCACCCACGAGGAGCAT<br>CGTGGAAAAAGAAGAGGTTCCAACCACGTCTACAAA<br>GCAAGTGGATTGATGTGACATCTCCACTGACGTAAG<br>GGATGACGCACAATCCCACTATCCTTCGCAAGACCC<br>TTCCTCTATATAAGGAAGTTCATTTCAATTTGGAGAGG<br>ACACGCGTTTATTTACAAGAGCGTACGGTTCAATCC<br>CTGCCTCCCCTGTAAAACCTACCCTTTGAAAACCTCTC<br>TTTCTTAATCTTTTCTTTGTAATTCCAGATCTATGTGA<br>GACC |
| P2   | Mas promoter | GGTCTCAAACGCGGAGATTTTTCAAATCAGTGCGCA<br>AGACGTGACGTAAGTATCCGAGTCAGTTTTTATTTTT<br>CTAATAATTTGGTCGTTTATTTTCGGCGTGTAGGACAT<br>GGCAACCGGGCCTGAATTTTCGCGGGTATTCTGTTTC<br>TATTTCAACTTTTTCTTGATCCGCAGCCATTAACGAC<br>TTTTGAATAGATACGCTGACACGCCAAGCCTCGCTA<br>GTCAAAAGTGTACCAACAACGCTTTACAGCAAGAA<br>CGGAATGCGCGTGACGCTCGCGGTGACGCCATTTTC<br>GCCTTTTCAGAAATGGATAAATAGCCTTGCTTCCTAT<br>TATATCTTCCCAAATTACCAATACATTACACTAGCAT<br>CTGAATTTCATAACCAATCTCGATACACCAAAATCGAG<br>ATCTATGTGAGACC                                                                                                                                                     |
| P4   | EBS promoter | GGTCTCAAACGCATTACGAATTCCCGGGGATCCTCA<br>TGATCAAAGGGGGGATGCACTATTTAAGATCCTCAT<br>GATCAAAGGGGGGATGCACTATTTAAGATCCTCATG<br>ATCAAAGGGGGGATGCACTATTTAAGATCCTCATGA<br>TCAAAGGGGGGATGCACTATTTAAGATCCTCATGAT<br>CAAAGGGGGGATGCACTATTTAAGATCCTTCGCAAG<br>ACCCTTCCTCTATATAAGGAAGTTCATTTCAATTTGGA<br>GAGGACAGGGTATCAAGCTTGGCACTGGCCGTCGT<br>TTTACAACGTCGTGACTGGGAAAACCTGGCGTTAC                                                                                                                                                                                                                                                               |

|        |                                        |                                                                                                                                                                                                                                                                                                        |
|--------|----------------------------------------|--------------------------------------------------------------------------------------------------------------------------------------------------------------------------------------------------------------------------------------------------------------------------------------------------------|
|        |                                        | CCA ACTTAAATCGCCTTGCAGCACATCCCCCTTTCGC<br>CAGCTGGCGTAATAGCGAAGAGGCCCGCACCGATC<br>GCCCTTCCCAACAGTTGCGCAGCCTGAAGCCTAGG<br>GAGGAGTCCACTCTATGTGAGACC                                                                                                                                                       |
| pATF-1 | Artificial promoter 1 (3 gRNA repeats) | GGTCTCAAACGCCAAACCACAATTTGCACACCCTGG<br>CATCTCAAACCACAATTTGCACACCCTGGCATCTCA<br>AACCACAATTTGCACACCCTGGCATCTCCGCAAGAC<br>CCTTCCTCTATATAAGGAAGTTCATTTCAATTTGGAGA<br>GGACACGCGTTTATTTACAAGAGCGTACGGTTCAAT<br>CCCTGCCTCCCCTGTAAAACCTACCCTTTGAAAACCT<br>CTCTTTCTTAATCTTTTCTTTGTAATTCAGATCTATG<br>TGAGACC    |
| pATF-3 | Artificial promoter 3 (3 gRNA repeats) | GGTCTCAAACGCCCTGACTCACAGTCCTATCGAGTGG<br>CATCTCTGACTCACAGTCCTATCGAGTGGCATCTCT<br>GACTCACAGTCCTATCGAGTGGCATCTCCGCAAGAC<br>CCTTCCTCTATATAAGGAAGTTCATTTCAATTTGGAGA<br>GGACACGCGTTTATTTACAAGAGCGTACGGTTCAAT<br>CCCTGCCTCCCCTGTAAAACCTACCCTTTGAAAACCT<br>CTCTTTCTTAATCTTTTCTTTGTAATTCAGATCTATG<br>TGAGACC   |
| pATF-4 | Artificial promoter 4 (3 gRNA repeats) | GGTCTCAAACGCCATTGCGCACCATTCCTACTAGTGG<br>CATCTCATTGCGCACCATTCCTACTAGTGGCATCTCA<br>TTGCGCACCATTCCTACTAGTGGCATCTCCGCAAGAC<br>CCTTCCTCTATATAAGGAAGTTCATTTCAATTTGGAGA<br>GGACACGCGTTTATTTACAAGAGCGTACGGTTCAAT<br>CCCTGCCTCCCCTGTAAAACCTACCCTTTGAAAACCT<br>CTCTTTCTTAATCTTTTCTTTGTAATTCAGATCTATG<br>TGAGACC |

126  
127  
128

## S1.2 Terminators

| Name | Description    | Sequence                                                                                                                                                                                                                                                         |
|------|----------------|------------------------------------------------------------------------------------------------------------------------------------------------------------------------------------------------------------------------------------------------------------------|
| T1   | 35S Terminator | GGTCTCAATCCTAACTCGAGCTCTAGCTAGAGTCGA<br>TCGACAAGCTCGAGTTTCTCCATAATAATGTGTGAGT<br>AGTTCCCAGATAAGGGAATTAGGGTTCCTATAGGGT<br>TTCGCTCATGTGTTGAGCATATAAGAAACCCTTAGTA<br>TGTATTTGTATTTGTAATACTTCTATCAATAAAATT<br>TCTAATTCCTAAAACCAAATCCAGTACTAAAATCCA<br>GATGCTGTGAGACC |

129  
130  
131  
132

## S1.3 Coding sequences

| Name | Description | Sequence |
|------|-------------|----------|
|------|-------------|----------|

|    |     |                                                                                                                                                                                                                                                                                                                                                                                                                                                                                                                                                                                                                                                                                                                                                                                                                                                                                                     |
|----|-----|-----------------------------------------------------------------------------------------------------------------------------------------------------------------------------------------------------------------------------------------------------------------------------------------------------------------------------------------------------------------------------------------------------------------------------------------------------------------------------------------------------------------------------------------------------------------------------------------------------------------------------------------------------------------------------------------------------------------------------------------------------------------------------------------------------------------------------------------------------------------------------------------------------|
| G1 | YFP | <p>GGTCTCATATGGTATCCAAAGGAGAAGAATTGTTTA<br/> CAGGGGTAGTCCCCATATTGGTCGAGCTCGATGGG<br/> GATGTAAACGGGCACAAGTTCTCAGTGTCTGGCGAA<br/> GGCGAAGGGGACGCCACATACGGAAAGTTGACTCT<br/> GAAGTTCATCTGCACAACCGGTAAACTACCCGTACC<br/> CTGGCCAACACTGGTGACGACCTTTGGGTACGGGC<br/> TACAATGTTTCGCTCGATATCCTGACCACATGAAGC<br/> AACACGATTTCTTCAAAGCGCCATGCCTGAGGGGT<br/> ATGTACAGGAGCGTACCATATTTTTCAAAGACGATG<br/> GAAACTATAAGACCCGAGCTGAAGTGAAATTTGAAG<br/> GAGATACGTTAGTCAATCGAATAGAATAAAGGGAA<br/> TTGATTTCAAGGAGGATGGGAATATTCTGGGCCATA<br/> AGCTGGAGTACAATTACAATAGTCACAACGTCTATAT<br/> AATGGCAGACAAGCAGAAGAATGGAATAAAGGTTAA<br/> TTTCAAGATAAGGCATAACATTGAAGACGGAAGCGT<br/> TCAGCTAGCCGATCATTACCAACAGAATACACCGAT<br/> AGGTGATGGACCCGTCCTGCTCCCCGACAACCATTA<br/> CTTGTCTTACCAGAGTGCACCTTTCTAAAGATCCAAAT<br/> GAGAAAAGAGATCATATGGTTTTATTAGAATTTGTTA<br/> CCGCAGCCGGCATAACTTTGGGAATGGACGAACTG<br/> TACAAATGAGGATCCTGAGACC</p> |
| G2 | RFP | <p>GGTCTCATATGAGCGAGCTGATTAAGGAGAACATGC<br/> ACATGAAGCTGTACATGGAGGGCACCGTGAACAAC<br/> CACCATTCAAGTGCACATCCGAGGGCGAAGGCAA<br/> GCCCTACGAGGGCACCCAGACCATGAGAATCAAGG<br/> TGGTCGAGGGCGGCCCTCTCCCCTTCGCCTTCGAC<br/> ATCCTGGCTACCAGCTTCATGTACGGCAGCAGAACC<br/> TTCATCAACCACACCCAGGGCATCCCCGACTTCTTT<br/> AAGCAGTCCTTCCCTGAGGGCTTCACATGGGAGAG<br/> AGTCACCACATACGAAGACGGGGGCGTGCTGACCG<br/> CTACCCAGGACACCAGCCTCCAGGACGGCTGCCTC<br/> ATCTACAACGTCAAGATCAGAGGGGTGAACTTCCCA<br/> TCCAACGGCCCTGTGATGCAGAAGAAAACACTCGG<br/> CTGGGAGGCCAACACCGAGATGCTGTACCCCGCTG<br/> ACGGCGGCCTGGAAGGCAGAAGCGACATGGCCCTG<br/> AAGCTCGTGGGCGGGGGCCACCTGATCTGCAACTT<br/> CAAGACCACATACAGATCCAAGAAACCCGCTAAGAA<br/> CCTCAAGATGCCCGGCGTCTACTATGTGGACCACAG<br/> ACTGGAAGAATCAAGGAGGCCGACAAAGAACTTA<br/> CGTCGAGCAGCATGAGGTTGCTGTGGCCAGATACT<br/> GCGACCTCCCTAGCAAACCTGGGGCACAAGTGAGGA<br/> TCTGAGACC</p>                           |

|     |            |                                                                                                                                                                                                                                                                                                                                                                                                                                                                                                                                                                                                                                                                                                                                                                                                                                                                                                                                                                                                                                                                                                  |
|-----|------------|--------------------------------------------------------------------------------------------------------------------------------------------------------------------------------------------------------------------------------------------------------------------------------------------------------------------------------------------------------------------------------------------------------------------------------------------------------------------------------------------------------------------------------------------------------------------------------------------------------------------------------------------------------------------------------------------------------------------------------------------------------------------------------------------------------------------------------------------------------------------------------------------------------------------------------------------------------------------------------------------------------------------------------------------------------------------------------------------------|
| G10 | BFP        | <p>GGTCTCATATGAGCGAAGAATAATCAAGGAAAATA<br/> TGCACATGAACTCTACATGGAGGGTACGGTTGACA<br/> ATCATCATTTCAAATGTACCGCAGAGGGCGAAGGTA<br/> AACCTATGAGGGCACCCAGACTATGCGAATCAAGG<br/> TTGTGGAGGGCGGGCCATTGCCCTTCGCTTTTGACA<br/> TCTTAGCTACTAGTTTCTTATATGGGAGCAAGACCTT<br/> TATAGATCACACACAGGGTATCCCGGACTTCTTTAAA<br/> CAGAGCTTTCCAGAAGGGTTCACCTGGGAAAGGGT<br/> GACAACCTATGAAGATGGCGGAGTGCTTACAGCGA<br/> CACAAGACACCTCCCTACAGGACGGCACCTAATAT<br/> ATAATGTCAAGATTCGTGGCGTAGATTCCTCAGCA<br/> ATGGCCCTGTTATGCAGAAGAAGACACTTGGATGGG<br/> AGGCTTTCACTGAAACCCTCTACCCGGCGGATGGA<br/> GGCTTAGAGGGGAGAAACGATATGGCGTTAAAGCT<br/> GGTCGGGGGATCACACTTGATCGCGCATGCAAAA<br/> CTACGTACAGGTCCAAGAAACCAGCAAAGAATCTCA<br/> AGATGCCAGGTGTATACTATGTGGATTACCGACTCG<br/> AGCGTATTAAGGAAGCAAACGACGAAACGTACGTCG<br/> AACACACGAAGTTGCAGTAGCAAGGTATAGCGACC<br/> TTCCCTCCAAGCTAGGACATAAGCTGAATGGGAGCG<br/> GATAAGGATCCTGAGACC</p>                                                                                                                                                                                                          |
| G17 | Luciferase | <p>GGTCTCATATGGAAGATGCAAAGAATATCAAAAAG<br/> GCCAGCGCCCTTCTACCCATTAGAAGATGGAACCG<br/> CAGGAGAGCAACTTCACAAGGCGATGAAACGATATG<br/> CTCTTGTCCCGGAACCATCGCTTTTACGGACGCAC<br/> ACATAGAGGTTAACATTACCTATGCGGAATATTTTGA<br/> AATGTCAGTCAGATTAGCAGAAGCAATGAAACGTTA<br/> TGGGCTCAACACTAACCATCGTATTGTTGTATGTAG<br/> CGAAAACAGCCTGCAGTTTTTTTATGCCGGTGCTCGG<br/> TGCCTGTTTCATCGGTGTAGCGGTTGCTCCCGCAA<br/> CGACATTTACAACGAGAGAGAACTGCTTAACAGCAT<br/> GAATATCAGCCAACCGACCGTCGTGTTTGTCTCAA<br/> AAAGGGACTACAAAAATTCTAAATGTCCAAAAGAAG<br/> TTACCTATTATCCAGAAAATTATTATTATGGATAGCAA<br/> GACGGATTATCAAGGATTCCAATCTATGTACACATTT<br/> GTTACGAGCCACTTACCTCCAGGTTTTAACGAATAT<br/> GATTTTGTGCCTGAGAGCTTTGATCGAGATAAGACC<br/> ATCGCGTTAATTATGAATAGTTCCGGCTCTACGGGG<br/> CTCCCAAAGGGAGTCGCACTACCACATCGAACTGC<br/> GTGCGTTAGATTTTCACATGCCAGAGATCCTATCTTC<br/> GGGAATCAGATTATTCCGGACACTGCAATACTGAGT<br/> GTGGTTCCGTTTCATCACGGGTTCCGGGATGTTACAG<br/> ACACTCGGTTACCTCATATGCGGATTTTCGTGTGGTG<br/> CTGATGTATAGGTTTGAAGAAGAGTTGTTCCCTAAGAT<br/> CCTTGCAGGATTACAAAATTCAGTCCGCCCTGTTAG<br/> TTCCCTACCTATTTTCTTTTTTCGCCAAGTCAACGTT</p> |



|     |            |                                                                                                                                                                                                                                                                                                                                                                                                                                                                                                                                                                                                                                                                                                                                                                                                                                                                                                                                                                                                                                          |
|-----|------------|------------------------------------------------------------------------------------------------------------------------------------------------------------------------------------------------------------------------------------------------------------------------------------------------------------------------------------------------------------------------------------------------------------------------------------------------------------------------------------------------------------------------------------------------------------------------------------------------------------------------------------------------------------------------------------------------------------------------------------------------------------------------------------------------------------------------------------------------------------------------------------------------------------------------------------------------------------------------------------------------------------------------------------------|
|     |            | <p>AATTGATAAATATGACCTATCCAACCTCCACGAAATT<br/> GCCAGTGGTGGGGCCCCCTTGTCCAAAGAAGTTGG<br/> TGAGGCAGTCGCTAAGAGGTTCCACCTGCCGGGTA<br/> TCCGTCAAGGCTACGGACTTACCGAAACAACCTCCG<br/> CTATTCTTATTACACCTGAAGGCGATGATAAGCCGG<br/> GTGCTGTCGGTAAGGTGGTGCCTTTTTTTGAGGCGA<br/> AGGTAGTGGACTTAGATACTGGCAAGACGCTCGGA<br/> GTTAATCAACGAGGCGAGCTCTGTGTCCGTGGTCCC<br/> ATGATAATGAGCGGATACGTCAACAATCCTGAGGCA<br/> ACCAACGCATTAATTGATAAAGACGGCTGGTTGCAT<br/> AGCGGGGATATCGCGTATTGGGATGAGGACGAACA<br/> CTTCTTTATAGTCGATAGGTTAAAGTCACTTATTAAG<br/> TATAAAGGTTATCAAGTCGCTCCCGCCGAACCTGGAG<br/> AGTATTCTTCTTCAGCATCCGAATATCTTTGACGCCG<br/> GTGTTGCAGGTCTTCCTGACGACGACGCCGGAGAA<br/> CTACCTGCAGCGGTCTGTTGCTCGAACATGGAAA<br/> GACAATGACCGAGAAGGAGATTGTAGATTACGTAGC<br/> TTCACAGGTCACCACCGCTAAAAAACTAAGAGGTGG<br/> TGTTGTCTTCGTAGATGAAGTGCCTAAAGGACTTAC<br/> CGGTAAACTCGACGCCAGGAAGATAAGAGAAATCCT<br/> GATCAAAGCGAAGAAGGGTGGTAAGTCTAAGCTGTA<br/> AGGATCCTGAGACC</p>                                                                                                     |
| G15 | dCas9:VP64 | <p>GGTCTCATATGCCCAAGAAGAAGAGGAAGGTGGAC<br/> AAGAAGTACTCCATTGGGCTCGCTATCGGCACAAAC<br/> AGCGTCGGCTGGGCCGTCATTACGGACGAGTACAA<br/> GGTGCCGAGCAAAAATTCAAAGTTCTGGGCAATAC<br/> CGATCGCCACAGCATAAAGAAGAACCTCATTGGCGC<br/> CCTCCTGTTCGACTCCGGGGAAACGGCCGAAGCCA<br/> CGCGGCTCAAAGAACAGCACGGCGCAGATATACC<br/> CGCAGAAAGAATCGGATCTGCTACCTGCAGGAGATC<br/> TTAGTAATGAGATGGCTAAGGTGGATGACTCTTTCT<br/> TCCATAGGCTGGAGGAGTCCTTTTTGGTGGAGGAG<br/> GATAAAAAGCACGAGCGCCACCCAATCTTTGGCAAT<br/> ATCGTGGACGAGGTGGCGTACCATGAAAAGTACCC<br/> AACCATATATCATCTGAGGAAGAAGCTTGTAGACAG<br/> TACTGATAAGGCTGACTTGCGGTTGATCTATCTCGC<br/> GCTGGCGCATATGATCAAATTCGGGGACACTTCT<br/> CATCGAGGGGGACCTGAACCCAGACAACAGCGATG<br/> TCGACAAACTCTTTATCCAACCTGTTTCAGACTTACAA<br/> TCAGCTTTTCGAAGAGAACCCGATCAACGCATCCGG<br/> AGTTGACGCCAAAGCAATCCTGAGCGCTAGGCTGTC<br/> CAAATCCCGGCGGCTCGAAAACCTCATCGCACAGCT<br/> CCCTGGGGAGAAGAAGAACGGCCTGTTTGGTAATCT<br/> TATCGCCCTGTCACCTCGGGCTGACCCCAACTTTAA<br/> ATCTAACTTCGACCTGGCCGAAGATGCCAAGCTTCA<br/> ACTGAGCAAAGACACCTACGATGATGATCTCGACAA</p> |

|  |  |                                                                                                                                                                                                                                                                                                                                                                                                                                                                                                                                                                                                                                                                                                                                                                                                                                                                                                                                                                                                                                                                                                                                                                                                                                                                                                                                                                                                                                                                                                                                                                                                                                                                                                                                                                                                                                                                                                     |
|--|--|-----------------------------------------------------------------------------------------------------------------------------------------------------------------------------------------------------------------------------------------------------------------------------------------------------------------------------------------------------------------------------------------------------------------------------------------------------------------------------------------------------------------------------------------------------------------------------------------------------------------------------------------------------------------------------------------------------------------------------------------------------------------------------------------------------------------------------------------------------------------------------------------------------------------------------------------------------------------------------------------------------------------------------------------------------------------------------------------------------------------------------------------------------------------------------------------------------------------------------------------------------------------------------------------------------------------------------------------------------------------------------------------------------------------------------------------------------------------------------------------------------------------------------------------------------------------------------------------------------------------------------------------------------------------------------------------------------------------------------------------------------------------------------------------------------------------------------------------------------------------------------------------------------|
|  |  | TCTGCTGGCCCAGATCGGCGACCAGTACGCAGACC<br>TTTTTTTGGCGGCAAAGAACCCTGTCAGACGCCATTC<br>TGCTGAGTGATATTCTGCGAGTGAACACGGAGATCA<br>CCAAAGCTCCGCTGAGCGCTAGTATGATCAAGCGCT<br>ATGATGAGCACCACCAAGACTTGACTTTGCTGAAGG<br>CCCTTGTCAGACAGCAACTGCCTGAGAAGTACAAGG<br>AAATTTTCTTCGATCAGTCTAAAAATGGCTACGCCGG<br>ATACATTGACGGCGGAGCAAGCCAGGAGGAATTTTA<br>CAAATTTATTAAGCCCATCTTGGAATAAATGGACGG<br>CACCGAGGAGCTGCTGGTAAAGCTTAACAGAGAAG<br>ATCTGTTGCGCAAACAGCGCACTTTTCGACAATGGAA<br>GCATCCCCCACCAGATTCACCTGGGCGAACTGCAC<br>GCTATCCTCAGGCGGCAAGAGGATTTCTACCCCTTT<br>TTGAAAGATAACAGGGGAAAAGATTGAGAAAATCCTC<br>ACATTTGCGATACCCTACTATGTAGGCCCCCTCGCC<br>CGGGGAAATTCCAGATTCGCGTGGATGACTCGCAA<br>TCAGAAGAGACTATCACTCCCTGGAACCTTCGAGGAA<br>GTCGTGGATAAGGGGGCCTCTGCCCAGTCCTTCAT<br>CGAAAGGATGACTAACTTTGATAAAAATCTGCCTAAC<br>GAAAAGGTGCTTCTAACACTCTCTGCTGTACGAG<br>TACTTCACAGTTTATAACGAGCTACCAAGGTCAAAT<br>ACGTCACAGAAGGGATGAGAAAGCCAGCATTCTGT<br>CTGGAGAGCAGAAGAAAGCTATCGTGGACCTCCTCT<br>TCAAGACGAACCGGAAAGTTACCGTGAAACAGCTCA<br>AAGAAGATTATTTCAAAAAGATTGAATGTTTCGACTC<br>TGTTGAAATCAGCGGAGTGGAGGATCGCTTCAACGC<br>ATCCCTGGGAACGTATCACGATCTCCTGAAAATCAT<br>TAAAGACAAGGACTTCTTGACAATGAGGAGAACGA<br>GGACATTCTTGAGGACATTGTCCTCACCTTACGTT<br>GTTTGAAGATAGGGAGATGATTGAAGAACGCTTGAA<br>AACTTACGCTCATCTCTTCGACGACAAAGTCATGAAA<br>CAGCTCAAGAGGGCGCCGATATACAGGATGGGGGCG<br>GCTGTCAAGAAAATGATCAATGGGATCCGAGACAA<br>GCAGAGTGGAAGACAATCCTGGATTTTCTTAAGTC<br>CGATGGATTTGCCAACCGGAACTTCATGCAGTTGAT<br>CCATGATGACTCTCTCACCTTTAAGGAGGACATCCA<br>GAAAGCACAAGTTTCTGGCCAGGGGGACAGTCTCC<br>ACGAGCACATCGCTAATCTTGCAGGTAGCCCAGCTA<br>TCAAAAAGGGAATACTGCAGACCGTTAAGGTCGTGG<br>ATGAACTCGTCAAAGTAATGGGAAGGCATAAGCCCG<br>AGAATATCGTTATCGAGATGGCCCGAGAGAACCAA<br>CTACCCAGAAGGGACAGAAGAACAGTAGGGAAAGG<br>ATGAAGAGGATTGAAGAGGGTATAAAGAAGTGGGG<br>TCCCAAATCCTTAAGGAACACCCAGTTGAAAACACC<br>CAGCTTCAGAATGAGAAGCTCTACCTGTACTACCTG<br>CAGAACGGCAGGGACATGTACGTGGATCAGGAACT |
|--|--|-----------------------------------------------------------------------------------------------------------------------------------------------------------------------------------------------------------------------------------------------------------------------------------------------------------------------------------------------------------------------------------------------------------------------------------------------------------------------------------------------------------------------------------------------------------------------------------------------------------------------------------------------------------------------------------------------------------------------------------------------------------------------------------------------------------------------------------------------------------------------------------------------------------------------------------------------------------------------------------------------------------------------------------------------------------------------------------------------------------------------------------------------------------------------------------------------------------------------------------------------------------------------------------------------------------------------------------------------------------------------------------------------------------------------------------------------------------------------------------------------------------------------------------------------------------------------------------------------------------------------------------------------------------------------------------------------------------------------------------------------------------------------------------------------------------------------------------------------------------------------------------------------------|

|  |  |                                                                                                                                                                                                                                                                                                                                                                                                                                                                                                                                                                                                                                                                                                                                                                                                                                                                                                                                                                                                                                                                                                                                                                                                                                                                                                                                                                                                                                                                                                                                                                                                                                                                                                                                                                                                                                                                                                        |
|--|--|--------------------------------------------------------------------------------------------------------------------------------------------------------------------------------------------------------------------------------------------------------------------------------------------------------------------------------------------------------------------------------------------------------------------------------------------------------------------------------------------------------------------------------------------------------------------------------------------------------------------------------------------------------------------------------------------------------------------------------------------------------------------------------------------------------------------------------------------------------------------------------------------------------------------------------------------------------------------------------------------------------------------------------------------------------------------------------------------------------------------------------------------------------------------------------------------------------------------------------------------------------------------------------------------------------------------------------------------------------------------------------------------------------------------------------------------------------------------------------------------------------------------------------------------------------------------------------------------------------------------------------------------------------------------------------------------------------------------------------------------------------------------------------------------------------------------------------------------------------------------------------------------------------|
|  |  | GGACATCAATCGGCTCTCCGACTACGACGTGGATG<br>CCATCGTGCCCCAGTCTTTTCTCAAAGATGATTCTAT<br>TGATAATAAAGTGTTGACAAGATCCGATAAAAATAGA<br>GGGAAGAGTGATAACGTCCCCTCAGAAGAAGTTGTC<br>AAGAAAATGAAAAATTATTGGCGGCAGCTGCTGAAC<br>GCCAAACTGATCACACAACGGAAGTTCGATAATCTG<br>ACTAAGGCTGAACGAGGTGGCCTGTCTGAGTTGGAT<br>AAAGCCGGCTTCATCAAAGGCAGCTTGTTGAGACA<br>CGCCAGATCACCAAGCACGTGGCCCAAATTCTCGAT<br>TCACGCATGAACACCAAGTACGATGAAAATGACAAA<br>CTGATTCGAGAGGTGAAAGTTATTACTCTGAAGTCTA<br>AGCTGGTTTCAGATTCAGAAAGGACTTTCAGTTTTA<br>TAAGGTGAGAGAGATCAACAATTACCACCATGCGCA<br>TGATGCCTACCTGAATGCAGTGGTAGGCACTGCACT<br>TATCAAAAATATCCAAGCTTGAATCTGAATTTGTT<br>TACGGAGACTATAAAGTGACGATGTTAGGAAAATG<br>ATCGCAAAGTCTGAGCAGGAAATAGGCAAGGCCAC<br>CGCTAAGTACTTCTTTTACAGCAATATTATGAATTTT<br>TCAAGACCGAGATTACACTGGCCAATGGAGAGATTC<br>GGAAGCGACCACTTATCGAAACAAACGGAGAAACAG<br>GAGAAATCGTGTGGGACAAGGGTAGGGATTTGCGG<br>ACAGTCCGGAAGGTCCTGTCCATGCCGCAGGTGAA<br>CATCGTTAAAAAGACCGAAGTACAGACCGGAGGCTT<br>CTCCAAGGAAAGTATCCTCCCAGAAAGGAACAGCGA<br>CAAGCTGATCGCACGCAAAAAGATTGGGACCCCAA<br>GAAATACGGCGGATTTCGATTCTCCTACAGTCGCTTA<br>CAGTGTACTGGTTGTGGCCAAAGTGGAGAAAGGGA<br>AGTCTAAAAAACTCAAAGCGTCAAGGAACTGCTGG<br>GCATCACAATCATGGAGCGATCAAGCTTCGAAAAAA<br>ACCCCATCGACTTTCTCGAGGCGAAAGGATATAAAG<br>AGGTCAAAAAGACCTCATCATTAGCTTCCCAAGTA<br>CTCTCTCTTTGAGCTTGAAAACGGCCGGAAACGAAT<br>GCTCGCTAGTGCGGGCGAGCTGCAGAAAGGTAACG<br>AGCTGGCACTGCCCTCTAAATACGTTAATTTCTTGTA<br>TCTGGCCAGCCACTATGAAAAGCTCAAAGGATCTCC<br>CGAAGATAATGAGCAGAAGCAGCTGTTCTGTGGAACA<br>ACACAAACACTACCTTGATGAGATCATCGAGCAAAT<br>AAGCGAATTCTCCAAAAGAGTGATCCTCGCCGACGC<br>TAACCTCGATAAAGGTGCTTTCTGCTTACAATAAGCAC<br>AGGGATAAGCCCATCAGGGAGCAGGCAGAAAACAT<br>TATCCACTTGTTTACTCTGACCAACTTGGGCGCGCC<br>TGCAGCCTTCAAGTACTTCGACACCACCATAGACAG<br>AAAGCGGTACACCTCTACAAAGGAGGTCCTGGACG<br>CCACACTGATTCATCAGTCAATTACGGGGCTCTATG<br>AAACAAGAATCGACCTCTCTCAGCTCGGTGGAGACA<br>GCAGGGCTGATTCGGACCCAAAAAAGAAGCGTAAG |
|--|--|--------------------------------------------------------------------------------------------------------------------------------------------------------------------------------------------------------------------------------------------------------------------------------------------------------------------------------------------------------------------------------------------------------------------------------------------------------------------------------------------------------------------------------------------------------------------------------------------------------------------------------------------------------------------------------------------------------------------------------------------------------------------------------------------------------------------------------------------------------------------------------------------------------------------------------------------------------------------------------------------------------------------------------------------------------------------------------------------------------------------------------------------------------------------------------------------------------------------------------------------------------------------------------------------------------------------------------------------------------------------------------------------------------------------------------------------------------------------------------------------------------------------------------------------------------------------------------------------------------------------------------------------------------------------------------------------------------------------------------------------------------------------------------------------------------------------------------------------------------------------------------------------------------|

|  |  |                                                                                                                                                                                                                                                   |
|--|--|---------------------------------------------------------------------------------------------------------------------------------------------------------------------------------------------------------------------------------------------------|
|  |  | GTCGATCCCAAGAAGAAGAGAAAGGTAGATCCTAAG<br>AAGAAGAGAAAGGTAGACGCATTGGATGACTTCGAC<br>TTAGACATGCTTGGGTCAGATGCTTTGGACGACTTT<br>GACCTCGACATGTTGGGTTCTGACGCGCTAGATGAC<br>TTCGACTTGGACATGTTGGGCTCCGACGCTTTGGAC<br>GACTTTGATCTGGACATGTTATGAGGATCCTGAGAC<br>C |
|--|--|---------------------------------------------------------------------------------------------------------------------------------------------------------------------------------------------------------------------------------------------------|

133  
134  
135  
136

**S1.4 gRNA expression cassettes**

| Name      | Description                           | Sequence                                                                                                                                                                                                                                                                                                                                                                                                                                                                                                                                                                                                                                                                                                                                                                                                                                                                                                                                                                                                                                                                                                                  |
|-----------|---------------------------------------|---------------------------------------------------------------------------------------------------------------------------------------------------------------------------------------------------------------------------------------------------------------------------------------------------------------------------------------------------------------------------------------------------------------------------------------------------------------------------------------------------------------------------------------------------------------------------------------------------------------------------------------------------------------------------------------------------------------------------------------------------------------------------------------------------------------------------------------------------------------------------------------------------------------------------------------------------------------------------------------------------------------------------------------------------------------------------------------------------------------------------|
| U6-gRNA-1 | U6 promoter driving gRNA-1 expression | GGTCTCAAACGTTTCGACGTAAAGCCTGTAGAAGAGG<br>TTTCTAGCGAACGACACGAGTTTGAGCCTCATGAAG<br>CTTCGTTGAACAACGGAAACTCGACTTGCCTTCCGC<br>ACAATACATCATTTCTTCTTAGCTTTTTTCTTCTTCT<br>TCGTTCCATACAGTTTTTTTTGTTTATCAGCTTACATT<br>TTCTTGAACCGTAGCTTTCGTTTTCTTCTTTTAACTT<br>TCCATTCGGAGTTTTGTATCTTGTTTCATAGTTTGT<br>CCCAGGATTAGAATGATTAGGCATCGAACCTTCAAG<br>AATTTGATTGAATAAAACATCTTCATTCTTAAGATATG<br>AAGATAATCTTCAAAGGCCCTGGGAATCTGAAAG<br>AAGAGAAGCAGGCCATTTATATGGGAAGAACAAT<br>AGTATTTCTTATATAGGCCCATTTAAGTTGAAAACAA<br>TCTTCAAAGTCCCACATCGCTTAGATAAGAAAACGA<br>AGCTGAGTTTATATACAGCTAGAGTCGAAGTAGTGA<br>TTAAACCACAATTTGCACACCCGTTTTAGAGCTAGAA<br>ATAGCAAGTTAAAATAAGGCTAGTCCGTTATCAACTT<br>GAAAAAGTGGCACCGAGTCGGTGCTTTTTTTGCAA<br>ATTTTCCAGATCGATTTCTTCTTCTGTTCTTCCGG<br>CGTTCAATTTCTGGGTTTTTCTTTCGTTTTCTGTAAC<br>TGAAACCTAAAATTTGACCTAAAAAAATCTCAAATA<br>ATATGATTCAGTGGTTTTGTACTTTTTCAGTTAGTTGA<br>GTTTTGCAGTTCCGATGAGATAAACCAATAACTTTGC<br>TTAGATCTAATTCATTCCGTTACACCTCTGATGGAGA<br>TGGAAGGTTCTTAATAATGATGCCATTTTTGGGTAA<br>TAATTTGAATTAGAATCAAGGGTATAAGATTCATAA<br>TTAACATCACTTAAGCAAAGTTCGTAATATACGACCA<br>CAGGATATAATTTTTGGTACGCTGTGAGACC |

|                       |                                                       |                                                                                                                                                                                                                                                                                                                                                                                                                                                                                                                                                                                                                                                                                                                                                                                                                                                                                                                                                                                                                                                                                                                                                                                             |
|-----------------------|-------------------------------------------------------|---------------------------------------------------------------------------------------------------------------------------------------------------------------------------------------------------------------------------------------------------------------------------------------------------------------------------------------------------------------------------------------------------------------------------------------------------------------------------------------------------------------------------------------------------------------------------------------------------------------------------------------------------------------------------------------------------------------------------------------------------------------------------------------------------------------------------------------------------------------------------------------------------------------------------------------------------------------------------------------------------------------------------------------------------------------------------------------------------------------------------------------------------------------------------------------------|
| <p>U6-<br/>gRNA-3</p> | <p>U6 promoter<br/>driving gRNA-<br/>3 expression</p> | <p>GGTCTCAAACGTTTCGACGTAAAGCCTGTAGAAGAGG<br/> TTTCTAGCGAACGACACGAGTTTGAGCCTCATGAAG<br/> CTTCGTTGAACAACGGAACTCGACTTGCCTTCCGC<br/> ACAATACATCATTTCTTCTTAGCTTTTTTTCTTCTTCT<br/> TCGTTCATAACAGTTTTTTTTGTTTATCAGCTTACATT<br/> TTCTTGAACCGTAGCTTTTCGTTTTCTTCTTTTAACTT<br/> TCCATTTCGGAGTTTTTGTATCTTGTTTCATAGTTTGT<br/> CCCAGGATTAGAATGATTAGGCATCGAACCTTCAAG<br/> AATTTGATTGAATAAAACATCTTCATTCTTAAGATATG<br/> AAGATAATCTTCAAAGGCCCTGGGAATCTGAAAG<br/> AAGAGAAGCAGGCCATTTATATGGGAAGAACAAT<br/> AGTATTTCTTATATAGGCCCATTTAAGTTGAAAACAA<br/> TCTTCAAAGTCCCACATCGCTTAGATAAGAAAACGA<br/> AGCTGAGTTTATATACAGCTAGAGTCGAAGTAGTGA<br/> TTTGACTCACAGTCCTATCGAGGTTTTAGAGCTAGAA<br/> ATAGCAAGTTAAAATAAGGCTAGTCCGTTATCAACTT<br/> GAAAAGTGGCACCGAGTCGGTGCTTTTTTTGCAAA<br/> ATTTTCCAGATCGATTTCTTCTTCTCTGTTCTTTCGG<br/> CGTTCAATTTCTGGGTTTTTCTCTTCGTTTTCTGTAAC<br/> TGAAACCTAAAATTTGACCTAAAAAAAATCTCAAATA<br/> ATATGATTCAGTGGTTTTGTACTTTTCAGTTAGTTGA<br/> GTTTTGCAGTTCGGATGAGATAAACCAATAACTTTGC<br/> TTAGATCTAATTCATTCCGTTACACCTCTGATGGAGA<br/> TGGAAGGTTCTTAATAATGATGCCATTTTTTGGGTAA<br/> TAATTTGAATTAGAATCAAGGGTATAAGATTCTATA<br/> TTAACATCACTTAAGCAAAGTTCGTAATATACGACCA<br/> CAGGATATAATTTTTGGTACGCTGTGAGACC</p> |
| <p>U6-<br/>gRNA-4</p> | <p>U6 promoter<br/>driving gRNA-<br/>4 expression</p> | <p>GGTCTCAAACGTTTCGACGTAAAGCCTGTAGAAGAGG<br/> TTTCTAGCGAACGACACGAGTTTGAGCCTCATGAAG<br/> CTTCGTTGAACAACGGAACTCGACTTGCCTTCCGC<br/> ACAATACATCATTTCTTCTTAGCTTTTTTTCTTCTTCT<br/> TCGTTCATAACAGTTTTTTTTGTTTATCAGCTTACATT<br/> TTCTTGAACCGTAGCTTTTCGTTTTCTTCTTTTAACTT<br/> TCCATTTCGGAGTTTTTGTATCTTGTTTCATAGTTTGT<br/> CCCAGGATTAGAATGATTAGGCATCGAACCTTCAAG<br/> AATTTGATTGAATAAAACATCTTCATTCTTAAGATATG<br/> AAGATAATCTTCAAAGGCCCTGGGAATCTGAAAG<br/> AAGAGAAGCAGGCCATTTATATGGGAAGAACAAT<br/> AGTATTTCTTATATAGGCCCATTTAAGTTGAAAACAA<br/> TCTTCAAAGTCCCACATCGCTTAGATAAGAAAACGA<br/> AGCTGAGTTTATATACAGCTAGAGTCGAAGTAGTGA<br/> TTATTGCGCACCATTCCTACTAGTTTTAGAGCTAGAA<br/> ATAGCAAGTTAAAATAAGGCTAGTCCGTTATCAACTT<br/> GAAAAGTGGCACCGAGTCGGTGCTTTTTTTGCAAA<br/> ATTTTCCAGATCGATTTCTTCTTCTCTGTTCTTTCGG<br/> CGTTCAATTTCTGGGTTTTTCTCTTCGTTTTCTGTAAC</p>                                                                                                                                                                                                                                                                                                                                                  |

|                |                                                            |                                                                                                                                                                                                                                                                                                                                   |
|----------------|------------------------------------------------------------|-----------------------------------------------------------------------------------------------------------------------------------------------------------------------------------------------------------------------------------------------------------------------------------------------------------------------------------|
|                |                                                            | TGAAACCTAAAATTTGACCTAAAAAAAATCTCAAATA<br>ATATGATTCAGTGGTTTTGTA CTTTTT CAGTTAGTTGA<br>GTTTTGCAGTTCCGATGAGATAAACCAATAACTTTGC<br>TTAGATCTAATTCATTCCGTTACACCTCTGATGGAGA<br>TGAAGGTTCTTAATAATGATGCCATTTTTTGGGTAA<br>TAATTTTGAATTAGAATCAAGGGTATAAGATT CATAA<br>TTAACATCACTTAAGCAAAGTTCGTAATATACGACCA<br>CAGGATATAATTTTTGGTACGCTGTGAGACC |
| HHR-<br>gRNA-1 | gRNA-1<br>expression<br>flanked by 5'<br>HHR and 3'<br>HDV | GGTCTCATATGCGACTACTGATGAGTCCGTGAGGAC<br>GAAACGAGTAAGCTCGTCAAACCACAATTTGCACAC<br>CCGTTTTAGAGCTAGAAATAGCAAGTTAAAATAAGG<br>CTAGTCCGTTATCAACTTGAAAAAGTGGCACCGAGT<br>CGGTGCTTTTTGGCCGGCATGGTCCCAGCCTCCTCG<br>CTGGCGCCGGCTGGGCAACATGCTTCGGCATGGCG<br>AATGGGACGGATCCTGAGACC                                                              |
| HHR-<br>gRNA-3 | gRNA-3<br>expression<br>flanked by 5'<br>HHR and 3'<br>HDV | GGTCTCATATGGAGTCACTGATGAGTCCGTGAGGAC<br>GAAACGAGTAAGCTCGTCTGACTCACAGTCCTATCG<br>AGGTTTTAGAGCTAGAAATAGCAAGTTAAAATAAGG<br>CTAGTCCGTTATCAACTTGAAAAAGTGGCACCGAGT<br>CGGTGCTTTTTGGCCGGCATGGTCCCAGCCTCCTCG<br>CTGGCGCCGGCTGGGCAACATGCTTCGGCATGGCG<br>AATGGGACGGATCCTGAGACC                                                              |
| HHR-<br>gRNA-4 | gRNA-4<br>expression<br>flanked by 5'<br>HHR and 3'<br>HDV | GGTCTCATATGCGCAATCTGATGAGTCCGTGAGGAC<br>GAAACGAGTAAGCTCGTCATTGCGCACCATTCCACT<br>AGGTTTTAGAGCTAGAAATAGCAAGTTAAAATAAGG<br>CTAGTCCGTTATCAACTTGAAAAAGTGGCACCGAGT<br>CGGTGCTTTTTGGCCGGCATGGTCCCAGCCTCCTCG<br>CTGGCGCCGGCTGGGCAACATGCTTCGGCATGGCG<br>AATGGGACGGATCCTGAGACC                                                              |

137  
138  
139  
140  
141  
142  
143  
144  
145

### S1.5 Plant expression vector backbone elements

| Name | Description                                                 | Sequence                                                                                                                                                                                                                                                                    |
|------|-------------------------------------------------------------|-----------------------------------------------------------------------------------------------------------------------------------------------------------------------------------------------------------------------------------------------------------------------------|
| Pnos | Nos promoter<br>driving the plant<br>resistance<br>cassette | AGCGGAGAATTAAGGGAGTCACGTTATGACCCCC<br>GCCGATGACGCGGGACAAGCCGTTTTACGTTTGG<br>AACTGACAGAACCGCAACGTTGAAGGAGCCACTCA<br>GCCGCGGGTTTTCTGGAGTTTAATGAGCTAAGCACA<br>TACGTCAGAAACCATTATTGCGCGTTCAAAGTTCG<br>CCTAAGGTCACTATCAGCTAGCAAATATTTCTTGTC<br>AAAATGCTCCACTGACGTTCCATAAATCCCCTC |

|                  |                                                             |                                                                                                                                                                                                                                                                                                                                                                                                                                                                                                                                                                                                                                                                                                                                                                                                                                                                                                                          |
|------------------|-------------------------------------------------------------|--------------------------------------------------------------------------------------------------------------------------------------------------------------------------------------------------------------------------------------------------------------------------------------------------------------------------------------------------------------------------------------------------------------------------------------------------------------------------------------------------------------------------------------------------------------------------------------------------------------------------------------------------------------------------------------------------------------------------------------------------------------------------------------------------------------------------------------------------------------------------------------------------------------------------|
|                  |                                                             | GGTATCCAATTAGAGTCTCATATTCACTCTCAATCC<br>AAATAATCTGCACCGGATCT                                                                                                                                                                                                                                                                                                                                                                                                                                                                                                                                                                                                                                                                                                                                                                                                                                                             |
| KanR<br>(Plant)  | Kanamycin<br>coding<br>sequence<br>(plant)                  | ATGATTGAACAAGATGGATTGCACGCAGGTTCTCC<br>GGCCGCTTGGGTGGAGAGGCTATTCGGCTATGAC<br>TGGGCACAACAGACAATCGGCTGCTCTGATGCCG<br>CCGTGTTCCGGCTGTCAGCGCAGGGGGCGCCCGGT<br>TCTTTTTGTCAAGACCGACCTGTCCGGTGCCCTGA<br>ATGAACTCCAGGACGAGGCAGCGCGGCTATCGTG<br>GCTGGCCACGACGGGCGTTCCTTGCGCAGCTGTG<br>CTCGACGTTGTCACTGAAGCGGGAAGGGACTGGC<br>TGCTATTGGGCGAAGTGCCGGGGCAGGATCTCCT<br>GTCATCTCACCTTGCTCCTGCCGAGAAAGTATCCA<br>TCATGGCTGATGCAATGCGGCGGCTGCATACGCTT<br>GATCCGGCTACCTGCCATTTCGACCACCAAGCGA<br>AACATCGCATCGAGCGAGCACGTA CTGGATGGA<br>AGCCGGTCTTGTCGATCAGGATGATCTGGACGAA<br>GAGCATCAGGGGCTCGCGCCAGCCGAACTGTTCCG<br>CCAGGCTCAAGGCGCGTATGCCCGACGGCGAGGA<br>TCTCGTCGTGACTCATGGCGATGCCTGCTTGCCGA<br>ATATCATGGTGGAAAATGGCCGCTTTTTCTGGATTC<br>ATCGACTGTGGCCGGCTGGGTGTGGCGGACCGCT<br>ATCAGGACATAGCGTTGGCTACCCGTGATATTGCT<br>GAAGAGCTTGGCGGCGAATGGGCTGACCGCTTCC<br>TCGTGCTTTACGGTATCGCCGCTCCCGATTTCGCAG<br>CGCATCGCCTTCTATCGCCTTCTTGACGAGTTCTT<br>C |
| Tnos             | Nos terminator                                              | CTAGAGTCAAGCAGATCGTTCAAACATTTGGCAAT<br>AAAGTTTCTTAAGATTGAATCCTGTTGCCGGTCTTG<br>CGATGATTATCATATAATTTCTGTTGAATTACGTTAA<br>GCATGTAATAATTAACATGTAATGCATGACGTTATT<br>TATGAGATGGGTTTTTATGATTAGAGTCCCGCAATT<br>ATACATTTAATACGCGATAGAAAACAAAATATAGCG<br>CGCAA ACTAGGATAAATTATCGCGCGCGGTGTCAT<br>CTATGTTACTAGATCGA                                                                                                                                                                                                                                                                                                                                                                                                                                                                                                                                                                                                                |
| pVS1<br>replicon | OriV; RepA ;<br>StaA for<br>propagation in<br>Agrobacterium | CGTGCGGCTGCATGAAATCCTGGCCGGTTTGTCT<br>GATGCCAAGCTGGCGGCCTGGCCGGCCAGCTTGG<br>CCGCTGAAGAAACCGAGCGCCGCGTCTAAAAAG<br>GTGATGTGATTTGAGTAAAACAGCTTGCGTCATG<br>CGGTCGCTGCGTATATGATGCGATGAGTAAATAAA<br>CAAATACGCAAGGGGAACGCATGAAGGTTATCGCT<br>GTACTTAACCAGAAAGGCGGGTCAGGCAAGACGA<br>CCATCGCAACCCATCTAGCCCGCGCCCTGCAACT                                                                                                                                                                                                                                                                                                                                                                                                                                                                                                                                                                                                            |

|  |  |                                                                                                                                                                                                                                                                                                                                                                                                                                                                                                                                                                                                                                                                                                                                                                                                                                                                                                                                                                                                                                                                                                                                                                                                                                                                                                                                                                                                                                                                                                                                                                                                                                                                                                                                                                                                               |
|--|--|---------------------------------------------------------------------------------------------------------------------------------------------------------------------------------------------------------------------------------------------------------------------------------------------------------------------------------------------------------------------------------------------------------------------------------------------------------------------------------------------------------------------------------------------------------------------------------------------------------------------------------------------------------------------------------------------------------------------------------------------------------------------------------------------------------------------------------------------------------------------------------------------------------------------------------------------------------------------------------------------------------------------------------------------------------------------------------------------------------------------------------------------------------------------------------------------------------------------------------------------------------------------------------------------------------------------------------------------------------------------------------------------------------------------------------------------------------------------------------------------------------------------------------------------------------------------------------------------------------------------------------------------------------------------------------------------------------------------------------------------------------------------------------------------------------------|
|  |  | CGCCGGGGCCGATGTTCTGTTAGTCGATTCCGATC<br>CCCAGGGCAGTGCCCGCGATTGGGCGGCCGTGC<br>GGGAAGATCAACCGCTAACCGTTGTCGGCATCGA<br>CCGCCCCGACGATTGACCGCGACGTGAAGGCCATC<br>GGCCGGCGCGACTTCGTAGTGATCGACGGAGCGC<br>CCCAGGCGGGCGACTTGGCTGTGTCCGCGATCAA<br>GGCAGCCGACTTCGTGCTGATTCCGGTGCAGCCA<br>AGCCCTTACGACATATGGGCCACCGCCGACCTGG<br>TGAGCTGGTTAAGCAGCGCATTGAGGTCACGGA<br>TGGAAGGCTACAAGCGGCCTTTGTCGTGTCGCGG<br>GCGATCAAAGGCACGCGCATCGGCGGTGAGGTTG<br>CCGAGGCGCTGGCCGGGTACGAGCTGCCATTCT<br>TGAGTCCCGTATCACGCAGCGCGTGAGTACCCA<br>GGCACTGCCGCCGCCGGCACAACCGTTCTTGAAT<br>CAGAACCCGAGGGCGACGCTGCCCGCGAGGTCC<br>AGGCGCTGGCCGCTGAAATTAATCAAACTCATT<br>TGAGTTAATGAGGTAAAGAGAAAATGAGCAAAAGC<br>ACAAACACGCTAAGTGCCGGCCGTCCGAGCGCAC<br>GCAGCAGCAAGGCTGCAACGTTGGCCAGCCTGGC<br>AGACACGCCAGCCATGAAGCGGGTCAACTTTCAGT<br>TGCCGGCGGAGGATCACACCAAGCTGAAGATGTA<br>CGCGGTACGCCAAGGCAAGACCATTACCGAGCTG<br>CTATCTGAATACATCGCGCAGCTACCAGAGTAAAT<br>GAGCAAATGAATAAATGAGTAGATGAATTTTAGCG<br>GCTAAAGGAGGCGGCATGGAAAATCAAGAACAAC<br>CAGGCACCGACGCCGTGGAATGCCCATGTGTGG<br>AGGAACGGGCGGTTGGCCAGGCGTAAGCGGCTG<br>GGTTGTCTGCCGGCCCTGCAATGGCACTGGAACC<br>CCCAAGCCCGAGGAATCGGCGTGACGGTCGCAAA<br>CCATCCGGCCCCGTACAAATCGGCGCGGCGCTGG<br>GTGATGACCTGGTGGAGAAGTTGAAGGCCGCGCA<br>GGCCGCCAGCGGCAACGCATCGAGGCAGAAGC<br>ACGCCCCGGTGAATCGTGGCAAGCGGCCGCTGAT<br>CGAATCCGCAAAGAATCCCGGCAACCGCCGGCAG<br>CCGGTGCGCCGTCGATTAGGAAGCCGCCCAAGGG<br>CGACGAGCAACCAGATTTTTTCGTTCCGATGCTCT<br>ATGACGTGGGCACCCGCGATAGTCGCAGCATCAT<br>GGACGTGGCCGTTTTCCGTCTGTCAAGCGTGAC<br>CGACGAGCTGGCGAGGTGATCCGCTACGAGCTTC<br>CAGACGGGCACGTAGAGGTTTTCCGCAGGGCCGGC<br>CGGCATGGCCAGTGTGTGGGATTACGACCTGGTA<br>CTGATGGCGGTTTCCCATCTAACCGAATCCATGAA<br>CCGATACCGGGAAGGGAAGGGAGACAAGCCCGG<br>CCGCGTGTTCGTCCACACGTTGCGGACGTACTC<br>AAGTTCTGCCGGCGAGCCGATGGCGGAAAGCAGA<br>AAGACGACCTGGTAGAAACCTGCATTCCGTTAAAC |
|--|--|---------------------------------------------------------------------------------------------------------------------------------------------------------------------------------------------------------------------------------------------------------------------------------------------------------------------------------------------------------------------------------------------------------------------------------------------------------------------------------------------------------------------------------------------------------------------------------------------------------------------------------------------------------------------------------------------------------------------------------------------------------------------------------------------------------------------------------------------------------------------------------------------------------------------------------------------------------------------------------------------------------------------------------------------------------------------------------------------------------------------------------------------------------------------------------------------------------------------------------------------------------------------------------------------------------------------------------------------------------------------------------------------------------------------------------------------------------------------------------------------------------------------------------------------------------------------------------------------------------------------------------------------------------------------------------------------------------------------------------------------------------------------------------------------------------------|



|                        |                                                                    |                                                                                                                                                                                                                                                                                                                                                                                                                                                                                                                                                                                                                                                                                                                                                                                                                                                                                                                                                                                                                                                                                                                                                                                                                                                                                                                                                                                  |
|------------------------|--------------------------------------------------------------------|----------------------------------------------------------------------------------------------------------------------------------------------------------------------------------------------------------------------------------------------------------------------------------------------------------------------------------------------------------------------------------------------------------------------------------------------------------------------------------------------------------------------------------------------------------------------------------------------------------------------------------------------------------------------------------------------------------------------------------------------------------------------------------------------------------------------------------------------------------------------------------------------------------------------------------------------------------------------------------------------------------------------------------------------------------------------------------------------------------------------------------------------------------------------------------------------------------------------------------------------------------------------------------------------------------------------------------------------------------------------------------|
|                        |                                                                    | <p>ACCACGCACGTTGCCATGCAGCGTACGAAGAAGG<br/>         CCAAGAACGGCCGCTGGTGACGGTATCCGAGGG<br/>         TGAAGCCTTGATTAGCCGCTACAAGATCGTAAAGA<br/>         GCGAAACCGGGCGGCCGGAGTACATCGAGATCGA<br/>         GCTAGCTGATTGGATGTACCGCGAGATCACAGAAG<br/>         GCAAGAACCCGGACGTGCTGACGGTTCACCCCGA<br/>         TTACTTTTTGATCGATCCCGGCATCGGCCGTTTTCT<br/>         CTACCGCCTGGCACGCCGCGCCGCGAGGCAAGGC<br/>         AGAAGCCAGATGGTTGTTCAAGACGATCTACGAAC<br/>         GCAGTGGCAGCGCCGGAGAGTTCAAGAAGTTCTG<br/>         TTTCACCGTGCGCAAGCTGATCGGGTCAAATGACC<br/>         TGCCGGAGTACGATTTGAAGGAGGAGGCGGGGCA<br/>         GGCTGGCCCGATCCTAGTCATGCGCTACCGCAAC<br/>         CTGATCGAGGGCGAAGCATCCGCCGGTTCCTAAT<br/>         GTACGGAGCAGATGCTAGGGCAAATTGCCCTAGC<br/>         AGGGGAAAAAGGTGCAAAAAGCTTCTTTCCTGTGG<br/>         ATAGCACGTACATTGGGAACCCAAAGCCGTACATT<br/>         GGGAACCGGAACCCGTACATTGGGAACCCAAAGC<br/>         CGTACATTGGGAACCCGTACACATGTAAGTGACT<br/>         GATATAAAAGAGAAAAAAGGCGATTTTTCCGCCTA<br/>         AA ACTCTTTAAACTTATTA AA ACTCTTAAACCCG<br/>         CCTGGCCTGTGCATAACTGTCTGGCCAGCGCACA<br/>         GCCGAAGAGCTGCAAAAAGCGCCTACCCTTCGGT<br/>         CGCTGCGCTCCCTACGCCCCGCCGCTTCGCGTCG<br/>         GCCTATCGCGGCCGCTGGCCGCTCAAAAATGGCT<br/>         GGCCTACGGCCAGGCAATCTACCAGGGCGCGGAC<br/>         AAGCCGCGCCGTGCGCCACTCGACCGCCGGCGCC<br/>         CACATCAAGGCACC</p> |
| <p>pMB1<br/>origin</p> | <p>Origin of<br/>replication for<br/>propagation in<br/>E.coli</p> | <p>AAAGGATCTTCCTGAGATCCTTTTTTTCTGCGCGTA<br/>         ATCTGCTGCTTGCAAACAAAAAACCACCGCTACC<br/>         AGCGGTGGTTTGTGGCCGGATCAAGAGCTACCAA<br/>         CTCTTTTTCCGAAGGTA ACTGGCTTCAGCAGAGCG<br/>         CAGATACCAAATACTGTCCTTCTAGTGTAGCCGTA<br/>         GTTAGGCCACCACTTCAAGAACTCTGTAGCACCGC<br/>         CTACATACCTCGCTCTGCTAATCCTGTTACCAGTG<br/>         GCTGCTGCCAGTGGCGATAAGTCGTGTCTTACCG<br/>         GGTTGGACTCAAGACGATAGTTACCGGATAAGGC<br/>         GCAGCGGTCGGGCTGAACGGGGGGTTCGTGCAC<br/>         ACAGCCCAGCTTGGAGCGAACGACCTACACCGAA<br/>         CTGAGATACCTACAGCGTGAGCTATGAGAAAGCGC<br/>         CACGCTTCCCGAAGGGAGAAAGGCGGACAGGTAT<br/>         CCGGTAAGCGGCAGGGTTCGGAACAGGAGAGCGC<br/>         ACGAGGGAGCTTCCAGGGGGAAACGCCTGGTATC<br/>         TTTATAGTCCTGTGCGGGTTTCGCCACCTCTGACTT<br/>         GAGCGTCGATTTTTGTGATGCTCGTCAGGGGGGC<br/>         GGAGCCTATGGAAAAACGCCAGCAACGCG</p>                                                                                                                                                                                                                                                                                                                                                                                                                                                                                    |

|                     |                                                                                    |                                                                                                                                                                                                                                                                                                                                                                                                                                                                                                                                                                                                                                                                                                                                                                                                                                                                                                                                                                                                                                                                                                                                                           |
|---------------------|------------------------------------------------------------------------------------|-----------------------------------------------------------------------------------------------------------------------------------------------------------------------------------------------------------------------------------------------------------------------------------------------------------------------------------------------------------------------------------------------------------------------------------------------------------------------------------------------------------------------------------------------------------------------------------------------------------------------------------------------------------------------------------------------------------------------------------------------------------------------------------------------------------------------------------------------------------------------------------------------------------------------------------------------------------------------------------------------------------------------------------------------------------------------------------------------------------------------------------------------------------|
| KanR<br>(bacterial) | Kanamycin<br>expression<br>cassette<br>bacterial<br>selection<br>for               | GCCAATTCGTGCGCGGAACCCCTATTTGTTTATTTT<br>TCTAAATACATTCAAATATGTATCCGCTCATGAGAC<br>AATAACCCTGATAAATGCTTCAATAATATTGAAAA<br>GGAAGAGTATGGCTAAAATGAGAATATCACCGGAA<br>TTGAAAAAACTGATCGAAAAATACCGCTGCGTAAA<br>AGATACGGAAGGAATGTCTCCTGCTAAGGTATATA<br>AGCTGGTGGGAGAAAATGAAAACCTATATTTAAAA<br>ATGACGGACAGCCGGTATAAAGGGACCACCTATG<br>ATGTGGAACGGGAAAAGGACATGATGCTATGGCT<br>GGAAGGAAAGCTGCCTGTTCCAAGGTCCTGCACT<br>TTGAACGGCATGATGGCTGGAGCAATCTGCTCATG<br>AGTGAGGCCGATGGCGTCCTTTGCTCGGAAGAGT<br>ATGAAGATGAACAAAGCCCTGAAAAGATTATCGAG<br>CTGTATGCGGAGTGCATCAGGCTCTTTCACTCCAT<br>CGACATATCGGATTGTCCCTATACGAATAGCTTAG<br>ACAGCCGCTTAGCCGAATTGGATTACTTACTGAAT<br>AACGATCTGGCCGATGTGGATTGCGAAAACCTGGG<br>AAGAGGACACTCCATTTAAAGATCCGCGCGAGCTG<br>TATGATTTTTTAAGACGGAAAAGCCCGAAGAGGA<br>ACTTGTCTTTTCCCACGGCGACCTGGGAGACAGCA<br>ACATCTTTGTGAAAGATGGCAAAGTAAGTGGCTTT<br>ATTGATCTTGGGAGAAGCGGCAGGGCCGACAAGT<br>GGTATGACATTGCCTTCTGCGTCCGGTCGATCAGG<br>GAGGATATCGGGGAAGAACAGTATGTGCGAGCTATT<br>TTTTGACTTACTGGGGATCAAGCCTGATTGGGAGA<br>AAATAAAATATTATATTTTACTGGAATGATTTTAA<br>GCTGTCAGACCAAGTTTACTCATATATACTTTAGAT<br>TGATTTAAACTTTCATTTTTAATTTAAAGGATCTAG<br>GTGAAGATCCTTTTTGATAATC |
| LB                  | Left<br>repeat<br>border                                                           | CTGATGGGCTGCCTGTATCGAGTGGTGAATTTGTG<br>CCGAGCTGCCGGTCGGGGAGCTGTTGGCTGGCTG<br>GTGGCAGGATATATTGTGGTGTAAACAAATTGACG<br>CTTAGACAACCTTAATAACACATTGCGGACGTTTTTA<br>ATGTAATG                                                                                                                                                                                                                                                                                                                                                                                                                                                                                                                                                                                                                                                                                                                                                                                                                                                                                                                                                                                     |
| RB                  | Right<br>repeat<br>border                                                          | TGGTTGGCACATACAAATGGACGAACGGATAAACC<br>TTTTCACGCCCTTTTAAATATCCGATTATTCTAATAA<br>ACGCTCTTTTCTTTAGGTTTACCCGCCAATATATC<br>CTGTCAAACACTGATAGTTT                                                                                                                                                                                                                                                                                                                                                                                                                                                                                                                                                                                                                                                                                                                                                                                                                                                                                                                                                                                                               |
| GFP DO              | GFP<br>expression<br>cassette<br>drop-<br>out flanked by<br>connector<br>sequences | ACTGATGAGACGTGGTAGAGCCACAAACAGCCGG<br>TACAAGCAACGATCTCCAGGACCATCTGAATCATG<br>CGCGGATGACACGAACCTCACGACGGCGATCACAG<br>ACATTAACCCACAGTACAGACACTGCGACAACGTG<br>GCAATTCGTGCAATACAACGTGAGACCGAAAGTG<br>AAACGTGATTTTCATGCGTCATTTTGAACATTTTGT<br>AATCTTATTTAATAATGTGTGCGGCAATTCACATTT<br>AATTTATGAATGTTTTCTTAACATCGCGGCAACTCA                                                                                                                                                                                                                                                                                                                                                                                                                                                                                                                                                                                                                                                                                                                                                                                                                                     |

|  |  |                                                                                                                                                                                                                                                                                                                                                                                                                                                                                                                                                                                                                                                                                                                                                                                                                                                                                                                                                                                                                                                                                                                                                                                                                                                              |
|--|--|--------------------------------------------------------------------------------------------------------------------------------------------------------------------------------------------------------------------------------------------------------------------------------------------------------------------------------------------------------------------------------------------------------------------------------------------------------------------------------------------------------------------------------------------------------------------------------------------------------------------------------------------------------------------------------------------------------------------------------------------------------------------------------------------------------------------------------------------------------------------------------------------------------------------------------------------------------------------------------------------------------------------------------------------------------------------------------------------------------------------------------------------------------------------------------------------------------------------------------------------------------------|
|  |  | AGAAACGGCAGGTTCCGGATCTTAGCTACTAGAGAA<br>AGAGGAGAAATACTAGATGCGTAAAGGCGAAGAG<br>CTGTTCACTGGTGTGTCGTCCCTATTCTGGTGGAACT<br>GGATGGTGATGTCAACGGTCATAAGTTTTCCGTGC<br>GTGGCGAGGGTGAAGGTGACGCAACTAATGGTAA<br>ACTGACGCTGAAGTTCATCTGTACTACTGGTAAAC<br>TGCCGGTTCCTTGGCCGACTCTGGTAACGACGCT<br>GACTTATGGTGTTCAGTGCTTTGCTCGTTATCCGG<br>ACCATATGAAGCAGCATGACTTCTTCAAGTCCGCC<br>ATGCCGGAAGGCTATGTGCAGGAACGCACGATTT<br>CCTTTAAGGATGACGGCACGTACAAAACGCGTGC<br>GGAAGTGAAATTTGAAGGCGATACCCTGGTAAACC<br>GCATTGAGCTGAAAGGCATTGACTTTAAAGAGGAC<br>GGCAATATCCTGGGCCATAAGCTGGAATACAATTT<br>TAACAGCCACAATGTTTACATCACCGCCGATAAAC<br>AAAAAATGGCATTAAAGCGAATTTTAAAATTTCGCC<br>ATAACGTTGAGGATGGCAGCGTGCAGCTGGCTGA<br>TCACTACCAGCAAAACACTCCAATCGGTGATGGTC<br>CTGTTCTGCTGCCAGACAATCACTATCTGAGCACG<br>CAAAGCGTTCTGTCTAAAGATCCGAACGAGAAACG<br>CGATCATATGGTTCTGCTGGAGTTCGTAACCGCAG<br>CGGGCATCACGCATGGTATGGATGAACTGTACAAA<br>TGACCAGGCATCAAATAAAACGAAAGGCTCAGTCG<br>AAAGACTGGGCCTTTTCGTTTTATCTGTTGTTTGTGCG<br>GTGAACGCTCTCTACTAGAGTCACACTGGCTCACC<br>TTCGGGTGGGCCTTTCTGCGTTTATAGGTCTCAGC<br>TGAAATCTGCTCGTCAGTGGTGTCTCACACTGACG<br>AATCATGTACAGATCATACCGATGACTGCCTGGCG<br>ACTCACAATAAGCAAGACAGCCGGAACCAGCGC<br>CGGCGAACACCACTGCATATATGGCATATCACAAC<br>AGTCCACGTCTCAAGCAGTTACAGAGATGTTACGA<br>ACCG |
|--|--|--------------------------------------------------------------------------------------------------------------------------------------------------------------------------------------------------------------------------------------------------------------------------------------------------------------------------------------------------------------------------------------------------------------------------------------------------------------------------------------------------------------------------------------------------------------------------------------------------------------------------------------------------------------------------------------------------------------------------------------------------------------------------------------------------------------------------------------------------------------------------------------------------------------------------------------------------------------------------------------------------------------------------------------------------------------------------------------------------------------------------------------------------------------------------------------------------------------------------------------------------------------|

146  
147

**Table S2 : List of OCS constructs used**

| Name                  | Description                                                                                                                | Transcriptional Units                                                                                       |
|-----------------------|----------------------------------------------------------------------------------------------------------------------------|-------------------------------------------------------------------------------------------------------------|
| OCS 1-1<br>(13,694bp) | U6 driven constitutive expression of gRNA-1 leading to constitutive expression of YFP under the control of pATF-1 promoter | TU1 : U6 :gRNA-1 (1013 bp)<br>TU2 : pATF-1: YFP: T35S (1231 bp)<br>TU3E : P35S : dCas9:VP64: T35S (5162 bp) |

|                       |                                                                                                                                                             |                                                                                                                                                                                                                                   |
|-----------------------|-------------------------------------------------------------------------------------------------------------------------------------------------------------|-----------------------------------------------------------------------------------------------------------------------------------------------------------------------------------------------------------------------------------|
| OCS 1-5<br>(13,685bp) | 35S driven expression of gRNA-1 (flanked by ribozymes) leading to constitutive expression of YFP under the control of pATF-1 promoter                       | TU1 : P35S: HHR-gRNA-1-HDV:T35S (1001 bp)<br>TU2 : pATF-1 : YFP: T35S (1231 bp)<br>TU3E : P35S : dCas9:VP64: T35S (5162 bp)                                                                                                       |
| OCS 1-9<br>(13,592bp) | Ethylene inducible expression of gRNA-1 under the control of EBS promoter. YFP under the control of pATF-1 promoter                                         | TU1 : EBS: HHR-gRNA-1-HDV:T35S (917 bp)<br>TU2 : pATF-1 : YFP: T35S (1231 bp)<br>TU3E : P35S : dCas9:VP64: T35S (5162 bp)                                                                                                         |
| OCS 4-1<br>(14,627bp) | U6 driven constitutive expression of gRNA-1 leading to constitutive expression of Luc under the control of pATF-1 promoter                                  | TU1 : U6 :gRNA-1 (1013 bp)<br>TU2 : pATF-1 : Luc: T35S (2150 bp)<br>TU3E : P35S : dCas9:VP64: T35S (5162 bp)                                                                                                                      |
| OCS 3-5<br>(16,989bp) | Ratiometric circuit where YFP under the control of pATF-1 inducible by ethylene, while RFP and BFP under the control of Patf-3 are constitutively expressed | TU1 : EBS: HHR-gRNA-1-HDV:T35S (917 bp)<br>TU2 : pATF-1 : YFP: T35S (1231 bp)<br>TU3: pATF-3 : BFP : T35S (1228 bp)<br>TU4: U6 :gRNA3 (1013 bp)<br>TU5: pATF-3 : RFP : T35S (1214 bp)<br>TU6E : P35S : dCas9:VP64: T35S (5162 bp) |

148  
149  
150  
151  
152  
153  
154  
155

**Table S3: List of Addgene plasmids used in this study**

| Name                        | Description                                                                                                                            |
|-----------------------------|----------------------------------------------------------------------------------------------------------------------------------------|
| pICH86966<br>Addgene #48075 | Used as the backbone of the shuttle vector; Contains the pVS1 and pMB1 replicons, KanR (bacterial) as well as a plant KanR under pNos. |

|                           |                                                             |
|---------------------------|-------------------------------------------------------------|
| pYTK001<br>Addgene #65108 | Backbone for cloning all the parts listed in Table S1       |
| pYTK002<br>Addgene #65109 | Contains the connector LS; Used for the construction of TU1 |
| pYTK003<br>Addgene #65110 | Contains the connector L1; Used for the construction of TU2 |
| pYTK004<br>Addgene #65111 | Contains the connector L2; Used for the construction of TU3 |
| pYTK005<br>Addgene #65112 | Contains the connector L3; Used for the construction of TU4 |
| pYTK006<br>Addgene #65113 | Contains the connector L4; Used for the construction of TU5 |
| pYTK007<br>Addgene #65114 | Contains the connector L5; Used for the construction of TU6 |
| pYTK067<br>Addgene #65174 | Contains the connector R1; Used for the construction of TU1 |
| pYTK068<br>Addgene #65175 | Contains the connector R2; Used for the construction of TU2 |

|                           |                                                                        |
|---------------------------|------------------------------------------------------------------------|
| pYTK069<br>Addgene #65176 | Contains the connector R3; Used for the construction of TU3            |
| pYTK070<br>Addgene #65177 | Contains the connector R4; Used for the construction of TU4            |
| pYTK071<br>Addgene #65178 | Contains the connector R5; Used for the construction of TU5            |
| pYTK072<br>Addgene #65179 | Contains the connector RE; Used for the construction of TU6            |
| pYTK095<br>Addgene #65202 | Used as the backbone for the construction of any transcriptional unit. |

156  
157  
158  
159  
160
